CORRECTION

# Correction: Uncovering Spatiotemporal Characteristics of Human Online Behaviors during Extreme Events

The *PLOS ONE* Staff

The following information is missing from the Funding section: This work was supported by the National Natural Science Foundation of China (Nos. 61402379, 61403315), Natural Science Foundation of Chongqing (Nos. cstc2012jjA40013, cstc2013jcyjA40022) and the open project program of Key Laboratory of Symbolic Computation and Knowledge Engineering of Ministry of Education, Jilin University. The funders played no role in the study design, data collection and analysis, decision to publish, or preparation of the manuscript.

The publisher apologizes for the error.

## Reference

1. Gao C, Liu J (2015) Uncovering Spatiotemporal Characteristics of Human Online Behaviors during Extreme Events. *PLoS ONE* 10(10): e0138673. doi:[10.1371/journal.pone.0138673](https://doi.org/10.1371/journal.pone.0138673) PMID: [26492043](https://pubmed.ncbi.nlm.nih.gov/26492043/)

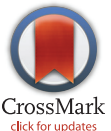

## OPEN ACCESS

**Citation:** The *PLOS ONE* Staff (2015) Correction: Uncovering Spatiotemporal Characteristics of Human Online Behaviors during Extreme Events. *PLoS ONE* 10(12): e0144666. doi:[10.1371/journal.pone.0144666](https://doi.org/10.1371/journal.pone.0144666)

**Published:** December 4, 2015

**Copyright:** © 2015 The PLOS ONE Staff. This is an open access article distributed under the terms of the [Creative Commons Attribution License](https://creativecommons.org/licenses/by/4.0/), which permits unrestricted use, distribution, and reproduction in any medium, provided the original author and source are credited.
